# Supplementary material for: Process of Introduction of Australian Braford Cattle to South America: Configuration of Population Structure and Genetic Diversity Evolution
Source: MDPI journal article supplement (doi:10.3390/ani12030275), 2022-01-23
Supplement: s1 [file s1]

**Table S2.** Descriptive statistics of average age (years) of the parents at the birth of their offspring and generation intervals or generation length (years) for the four gametic routes in the Braford cattle breed.

| Average age (years) of the parents at the birth of their offspring                                                                                                                   |                                                               |                |               |                         |                        |        |
|--------------------------------------------------------------------------------------------------------------------------------------------------------------------------------------|---------------------------------------------------------------|----------------|---------------|-------------------------|------------------------|--------|
| Parameter<br>Population set                                                                                                                                                          | Mean age of the<br>parents at the birth of<br>their offspring | Bull to<br>son | Cow to<br>son | Bull to<br>daught<br>er | Cow to<br>daught<br>er | Total  |
| Historical (n=36678)                                                                                                                                                                 | N                                                             | 85085          | 84656         | 121368                  | 122216                 | 413325 |
|                                                                                                                                                                                      | Mean                                                          | 8.45           | 7.76          | 20.83                   | 20.21                  | 15.42  |
|                                                                                                                                                                                      | SD                                                            | 7.24           | 8.04          | 12.78                   | 13.15                  | 12.67  |
|                                                                                                                                                                                      | SEM                                                           | 0.02           | 0.03          | 0.04                    | 0.04                   | 0.02   |
| Current (n=13968)                                                                                                                                                                    | N                                                             | 37839          | 35015         | 53724                   | 49830                  | 176408 |
|                                                                                                                                                                                      | Mean                                                          | 6.66           | 6.50          | 15.26                   | 13.72                  | 11.24  |
|                                                                                                                                                                                      | SD                                                            | 4.55           | 3.97          | 14.03                   | 13.55                  | 11.62  |
|                                                                                                                                                                                      | SEM                                                           | 0.02           | 0.02          | 0.07                    | 0.07                   | 0.03   |
| Generation intervals, generation length or average age (years) of the parents at birth of their offspring<br>that in their turn will produce the next generation of breeding animals |                                                               |                |               |                         |                        |        |
| Parameter<br>Population set                                                                                                                                                          | Gametic route                                                 | Bull to<br>son | Cow to<br>son | Bull to<br>daught<br>er | Cow to<br>daught<br>er | Total  |
| Historical (n=36678)                                                                                                                                                                 | N                                                             | 1982           | 23031         | 1916                    | 29898                  | 56827  |
|                                                                                                                                                                                      | Mean                                                          | 5.92           | 6.51          | 15.82                   | 20.05                  | 13.93  |
|                                                                                                                                                                                      | SD                                                            | 7.13           | 10.07         | 13.24                   | 13.61                  | 13.80  |
|                                                                                                                                                                                      | SEM                                                           | 0.16           | 0.07          | 0.30                    | 0.08                   | 0.06   |
| Current (n=13968)                                                                                                                                                                    | N                                                             | 370            | 6288          | 370                     | 8569                   | 15597  |
|                                                                                                                                                                                      | Mean                                                          | 6.38           | 6.69          | 14.68                   | 15.63                  | 11.78  |
|                                                                                                                                                                                      | SD                                                            | 4.19           | 4.61          | 14.03                   | 14.48                  | 12.18  |
|                                                                                                                                                                                      | SEM                                                           | 0.22           | 0.24          | 0.73                    | 0.75                   | 0.10   |
